# Supplementary material for: Single-cell heterogeneity underpins diatom success in dynamic ocean environments
Source: Research Square preprint supplement (doi:10.21203/rs.3.rs-7699470/v1), 2025-10-28
Supplement: Supplementary file 1 [file 85fef9983a25d7c67a39d486.pdf]

**Supplementary Table 1. Summary of Leiden cluster composition per sample**

| N-condition | Samples  | Total cells (n = 7303)<br>per sample | Leiden Cluster                                  | n cells per<br>cluster | (%) cells<br>per cluster |
|-------------|----------|--------------------------------------|-------------------------------------------------|------------------------|--------------------------|
| Depletion   | D1_Dark  | 161                                  | Nitrogen Assimilation                           | 7                      | 4.35                     |
|             |          |                                      | Nitrogen Starvation                             | 3                      | 1.86                     |
|             |          |                                      | Protein Synthesis (aqua blue)                   | 147                    | 91.30                    |
|             |          |                                      | Protein Synthesis (dark blue)                   | 4                      | 2.48                     |
|             | D1_Light | 485                                  | Multifunctional State                           | 26                     | 5.36                     |
|             |          |                                      | C & N Redistribution                            | 1                      | 0.21                     |
|             |          |                                      | Photosynthesis                                  | 456                    | 94.02                    |
|             |          |                                      | Protein Synthesis (dark blue)                   | 2                      | 0.41                     |
|             | D2_Dark  | 527                                  | Multifunctional State                           | 75                     | 14.23                    |
|             |          |                                      | C & N Redistribution                            | 8                      | 1.52                     |
|             |          |                                      | Nitrogen Assimilation                           | 347                    | 65.84                    |
|             |          |                                      | Nitrogen Starvation                             | 4                      | 0.76                     |
|             |          |                                      | Photosynthesis                                  | 1                      | 0.19                     |
|             |          |                                      | Protein Synthesis (aqua blue)                   | 54                     | 10.25                    |
|             |          |                                      | Protein Synthesis (dark blue)                   | 38                     | 7.21                     |
| Starvation  | D2_Light | 1260                                 | Multifunctional State                           | 11                     | 0.87                     |
|             |          |                                      | C & N Redistribution                            | 532                    | 42.22                    |
|             |          |                                      | Nitrogen Assimilation                           | 11                     | 0.87                     |
|             |          |                                      | Nitrogen Starvation                             | 25                     | 1.98                     |
|             |          |                                      | Protein Synthesis (aqua blue)                   | 3                      | 0.24                     |
|             |          |                                      | Protein Synthesis (dark blue)                   | 678                    | 53.81                    |
|             | D3_Light | 276                                  | Multifunctional State                           | 6                      | 2.17                     |
|             |          |                                      | C & N Redistribution                            | 95                     | 34.42                    |
|             |          |                                      | Nitrogen Assimilation                           | 11                     | 3.99                     |
|             |          |                                      | Nitrogen Starvation                             | 6                      | 2.17                     |
|             |          |                                      | Protein Synthesis (aqua blue)                   | 1                      | 0.36                     |
|             |          |                                      | Protein Synthesis (dark blue)                   | 157                    | 56.88                    |
|             | D4_Light | 579                                  | Multifunctional State                           | 7                      | 1.21                     |
|             |          |                                      | C & N Redistribution                            | 14                     | 2.42                     |
|             |          |                                      | Nitrogen Assimilation                           | 2                      | 0.35                     |
|             |          |                                      | Nitrogen Starvation                             | 501                    | 86.53                    |
|             |          |                                      | Protein Synthesis (dark blue)                   | 55                     | 9.50                     |
|             | D5_Dark  | 30                                   | Nitrogen Starvation                             | 25                     | 83.33                    |
|             |          |                                      | Photosynthesis & Nitrogen Assimilation (blue)   | 1                      | 3.33                     |
|             |          |                                      | Photosynthesis & Nitrogen Assimilation (purple) | 2                      | 6.67                     |
|             |          |                                      | Protein Turnover Inhibition                     | 2                      | 6.67                     |
| Recovery    | H02      | 540                                  | Nitrogen Starvation                             | 503                    | 93.15                    |
|             |          |                                      | Photosynthesis & Nitrogen Assimilation (blue)   | 2                      | 0.37                     |
|             |          |                                      | Photosynthesis & Nitrogen Assimilation (purple) | 8                      | 1.48                     |
|             |          |                                      | Protein Turnover Inhibition                     | 27                     | 5.00                     |
|             | H06      | 554                                  | Nitrogen Starvation                             | 526                    | 94.95                    |
|             |          |                                      | Photosynthesis & Nitrogen Assimilation (blue)   | 3                      | 0.54                     |
|             |          |                                      | Photosynthesis & Nitrogen Assimilation (purple) | 12                     | 2.17                     |
|             |          |                                      | Protein Turnover Inhibition                     | 11                     | 1.99                     |
|             |          |                                      | Silicon Import                                  | 2                      | 0.36                     |
|             | H12      | 2891                                 | Nitrogen Starvation                             | 72                     | 2.49                     |
|             |          |                                      | Photosynthesis & Nitrogen Assimilation (blue)   | 1257                   | 43.48                    |
|             |          |                                      | Photosynthesis & Nitrogen Assimilation (purple) | 1214                   | 41.99                    |
|             |          |                                      | Protein Turnover Inhibition                     | 214                    | 7.40                     |
|             |          |                                      | Silicon Import                                  | 134                    | 4.64                     |

**Supplementary Table 2. Summary of total cells in each Leiden cluster**

| N-condition | Sample   | Leiden Cluster                                  | n cells per sample | Total cells (n = 7303) per cluster |
|-------------|----------|-------------------------------------------------|--------------------|------------------------------------|
| Depletion   | D1_Light | C & N Redistribution                            | 1                  | 650                                |
| Depletion   | D2_Dark  |                                                 | 8                  |                                    |
| Starvation  | D2_Light |                                                 | 532                |                                    |
| Starvation  | D3_Light |                                                 | 95                 |                                    |
| Starvation  | D4_Light |                                                 | 14                 |                                    |
| Depletion   | D1_Light | Multifunctional State                           | 26                 | 125                                |
| Depletion   | D2_Dark  |                                                 | 75                 |                                    |
| Starvation  | D2_Light |                                                 | 11                 |                                    |
| Starvation  | D3_Light |                                                 | 6                  |                                    |
| Starvation  | D4_Light |                                                 | 7                  |                                    |
| Depletion   | D1_Dark  | Nitrogen Assimilation                           | 7                  | 378                                |
| Depletion   | D2_Dark  |                                                 | 347                |                                    |
| Starvation  | D2_Light |                                                 | 11                 |                                    |
| Starvation  | D3_Light |                                                 | 11                 |                                    |
| Starvation  | D4_Light |                                                 | 2                  |                                    |
| Depletion   | D1_Dark  | Nitrogen Starvation                             | 3                  | 539                                |
| Depletion   | D2_Dark  |                                                 | 4                  |                                    |
| Starvation  | D2_Light |                                                 | 25                 |                                    |
| Starvation  | D3_Light |                                                 | 6                  |                                    |
| Starvation  | D4_Light |                                                 | 501                |                                    |
| Starvation  | D5_Dark  | Nitrogen Starvation                             | 25                 | 1126                               |
| Recovery    | H02      |                                                 | 503                |                                    |
| Recovery    | H06      |                                                 | 526                |                                    |
| Recovery    | H12      |                                                 | 72                 |                                    |
| Depletion   | D1_Light | Photosynthesis                                  | 456                | 457                                |
| Depletion   | D2_Dark  |                                                 | 1                  |                                    |
| Starvation  | D5_Dark  | Photosynthesis & Nitrogen Assimilation (blue)   | 1                  | 1263                               |
| Recovery    | H02      |                                                 | 2                  |                                    |
| Recovery    | H06      |                                                 | 3                  |                                    |
| Recovery    | H12      |                                                 | 1257               |                                    |
| Starvation  | D5_Dark  | Photosynthesis & Nitrogen Assimilation (purple) | 2                  | 1236                               |
| Recovery    | H02      |                                                 | 8                  |                                    |
| Recovery    | H06      |                                                 | 12                 |                                    |
| Recovery    | H12      |                                                 | 1214               |                                    |
| Depletion   | D1_Dark  | Protein Synthesis (aqua blue)                   | 147                | 205                                |
| Depletion   | D2_Dark  |                                                 | 54                 |                                    |
| Starvation  | D2_Light |                                                 | 3                  |                                    |
| Starvation  | D3_Light |                                                 | 1                  |                                    |
| Depletion   | D1_Dark  | Protein Synthesis (dark blue)                   | 4                  | 934                                |
| Depletion   | D1_Light |                                                 | 2                  |                                    |
| Depletion   | D2_Dark  |                                                 | 38                 |                                    |
| Starvation  | D2_Light |                                                 | 678                |                                    |
| Starvation  | D3_Light |                                                 | 157                |                                    |
| Starvation  | D4_Light |                                                 | 55                 |                                    |
| Starvation  | D5_Dark  | Protein Turnover Inhibition                     | 2                  | 254                                |
| Recovery    | H02      |                                                 | 27                 |                                    |
| Recovery    | H06      |                                                 | 11                 |                                    |
| Recovery    | H12      |                                                 | 214                |                                    |
| Recovery    | H06      | Silicon Import                                  | 2                  | 136                                |
| Recovery    | H12      |                                                 | 134                |                                    |

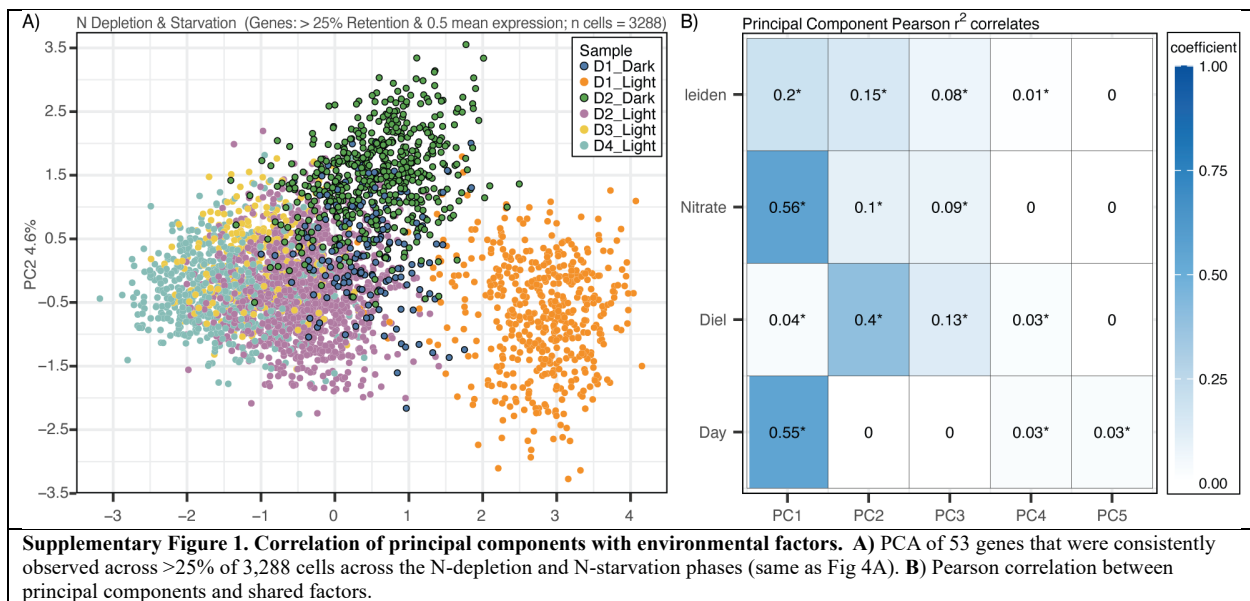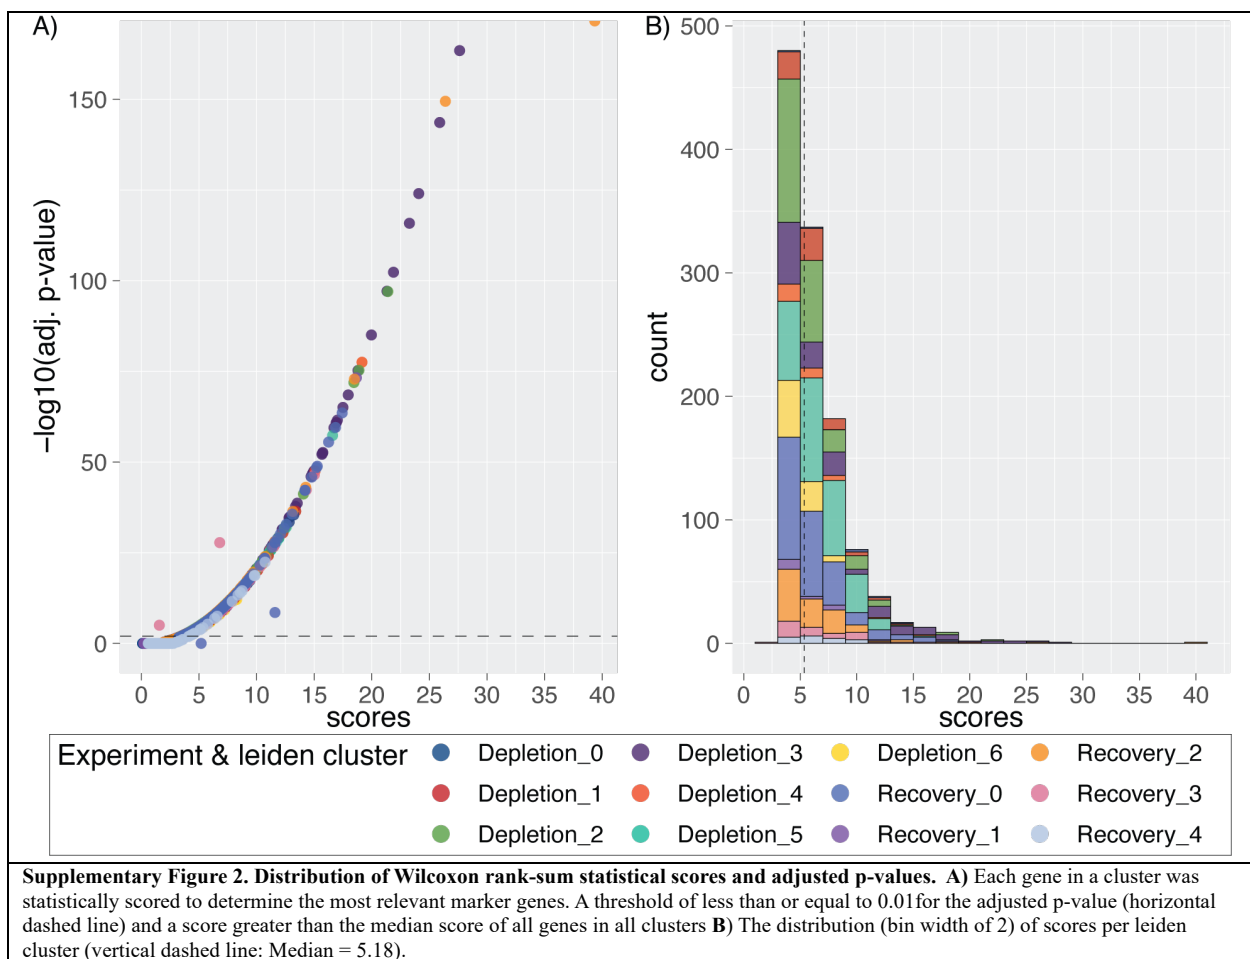

**Supplementary Data File 1. [Functional\_Enriched\_Genes\_Ranked.csv]** Significantly differentially expressed genes (i.e., adjusted p-value less than or equal to 0.01 and a score greater than the median score of all genes in all clusters) ranked per cluster that had a significant enrichment for a pathway or process sourced from Gene Ontology (MF, BP, and CC) and/or KEGG. Genes that did not have a functional enrichment were also added if their cluster rank was less than 20 to allow for manual curation and annotation.

- **gene\_symbol:** refers to the transcript id or gene symbol for a particular gene.
- **scores:** Wilcoxon rank-sum statistical score per cluster. Some genes appear in multiple clusters.
- **pval\_adj:** adjusted p-value from the Wilcoxon rank-sum statistical score (correction method: Benjamini-Hochberg).
- **Cluster\_Rank:** The ranking of each marker gene in a cluster (e.g., 1 = highest score).
- **Experiment\_leiden\_cluster:** Numerical designation for the cluster in each experiment (7 clusters for depletion, 5 clusters for recovery).
- **Exp\_Cluster\_ngenes:** Number of significantly differentially expressed genes per cluster that was searched for functional enrichment using gProfiler2.
- **source:** Databases for which functional enrichment's were sourced Gene Ontology<sup>1</sup> (MF, BP, and CC) and KEGG<sup>2</sup>.
- **p\_value:** the p-value refers to statistically significant result, which indicates the likelihood that the observed overlap between a list of genes and an enriched pathway, processes, or biological function is a true biological relationship<sup>3</sup>
- **term\_name:** the given name referenced from the source database
- **Leiden\_Cluster\_Name:** The name given to a leiden cluster, based on gene annotations, supporting biological information, and functional enrichment analysis.
- 

## References

- 1 Ashburner, M. *et al.* Gene ontology: tool for the unification of biology. The Gene Ontology Consortium. *Nat Genet* **25**, 25-29 (2000). <https://doi.org/10.1038/75556>
- 2 Kanehisa, M., Sato, Y., Furumichi, M., Morishima, K. & Tanabe, M. New approach for understanding genome variations in KEGG. *Nucleic Acids Res* **47**, D590-d595 (2019). <https://doi.org/10.1093/nar/gky962>
- 3 Kolberg L *et al.* “gprofiler2– an R package for gene list functional enrichment analysis and namespace conversion toolset g:Profiler.”. *F1000Research*, 9 (ELIXIR)(709). *R package version 0.2.3. 9 (ELIXIR)(709). R package version 0.2.3.* (2020).

•
